# Supplementary material for: Genome-wide analysis of microRNA to evaluate prognostic markers in isolated cancer glands and surrounding stroma in high-grade serous ovarian carcinoma
Source: PubMed Central journal article supplement — Oncol Lett. 2020 Oct 8;20(6):338. doi: 10.3892/ol.2020.12198 (PMC7583725; doi:10.3892/ol.2020.12198), 2020-10-08
Supplement: Supplementary_Data.pdf [file Supplementary_Data.pdf]

Figure S1. Receiver operating characteristic analyses of each miRNA in (A) isolated cancer glands and (B) stromal tissue. (A) (a) hsa-miR-188-5p; (b) hsa-miR-214-3p; (c) hsa-miR-505-5p; (d) hsa-miR-4455; (e) hsa-miR-6753-3p; (f) hsa-miR-6877-3p. (B) (a) hsa-miR-101-5p; (b) hsa-miR-320c; (c) hsa-miR-320d; (d) hsa-miR-320; (e) hsa-miR-378f; (f) hsa-miR-455-3p; (g) hsa-miR-4429. miRNA/miR, microRNA; AUC, area under the curve.

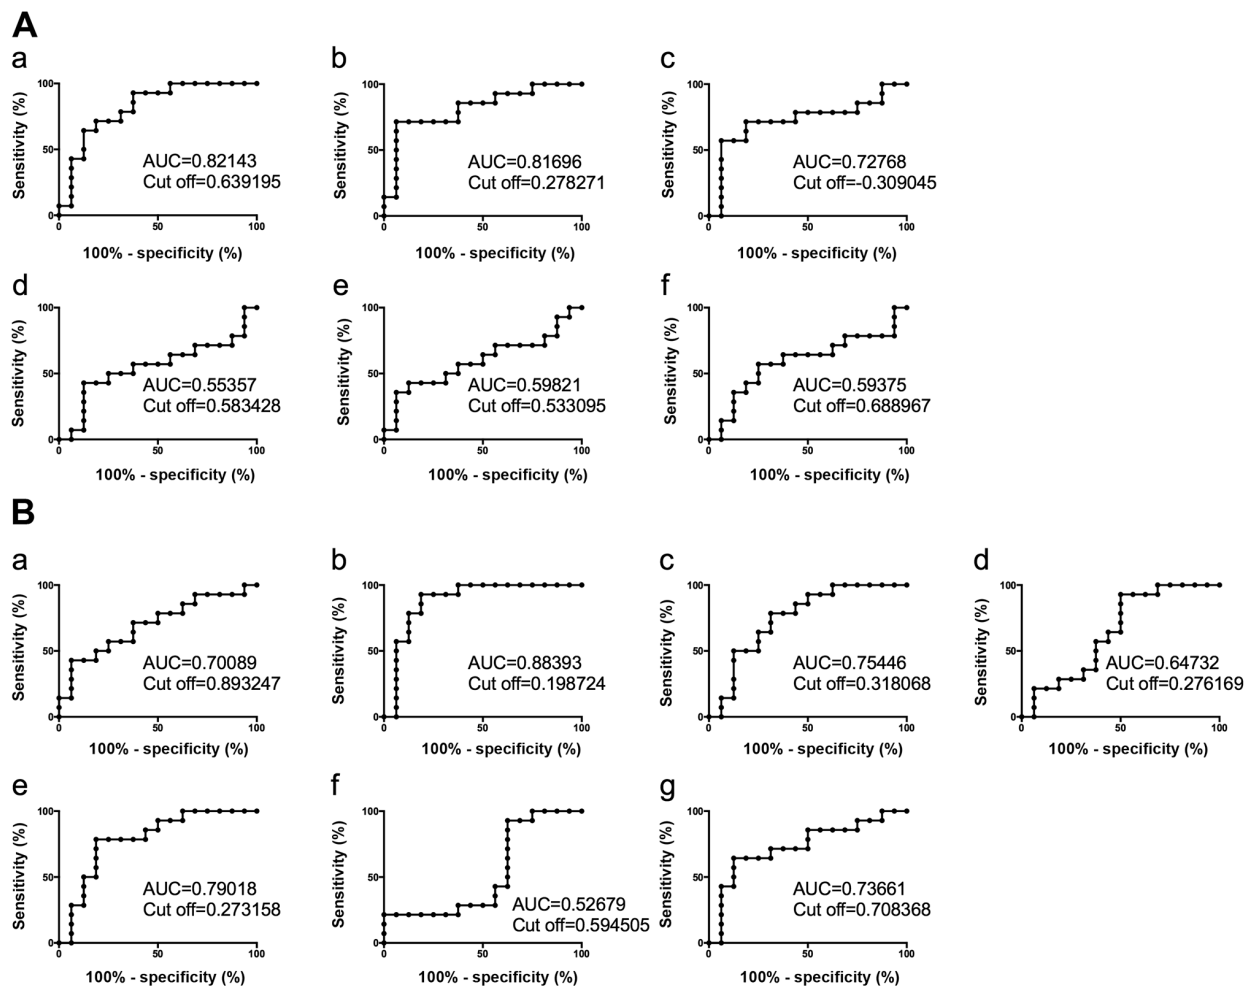

Table SI. List of miRNA primers used.

| miRNA           | Assay ID   | Sequence (3'-5')       |
|-----------------|------------|------------------------|
| hsa-miR-188-5p  | 002320     | CAUCCCUUGCAUGGUGGAGGG  |
| hsa-miR-214-3p  | 002306     | ACAGCAGGCACAGACAGGCAGU |
| hsa-miR-505-5p  | 002087     | GGGAGCCAGGAAGUAUUGAUGU |
| hsa-miR-4455    | 463355_mat | AGGGUGUGUGUGUUUUU      |
| hsa-miR-6753-3p | 466443_mat | UGGUCUGUCUCUGCCCUGGCAC |
| hsa-miR-6877-3p | 467048_mat | CAGCCUCUGCCCUUGGCCUCC  |
| hsa-miR-101-5p  | 002143     | CAGUUAUCACAGUGCUGAUGCU |
| hsa-miR-320c    | 241053_mat | AAAAGCUGGGUUGAGAGGGU   |
| hsa-miR-320d    | 241066_mat | AAAAGCUGGGUUGAGAGGA    |
| hsa-miR-320e    | 243005_mat | AAAGCUGGGUUGAGAAGG     |
| hsa-miR-378f    | 462794_mat | ACUGGACUUGGAGCCAGAAG   |
| hsa-miR-455-3p  | 002244     | GCAGUCCAUGGGCAUUAUACAC |
| hsa-miR-4429    | 464083_mat | AAAAGCUGGGCUGAGAGGCCG  |
| hsa-let-7a      | 000377     | UGAGGUAGUAGGUUGUAUAGUU |

miRNA/miR, microRNA.

Table SII. Fold-change in relative expression of miRNAs in an ovarian high-grade serous carcinoma microarray.

| miRNA           | Cancer gland cells      |                         | Cancer stromal cells    |                         |
|-----------------|-------------------------|-------------------------|-------------------------|-------------------------|
|                 | Positive for recurrence | Negative for recurrence | Positive for recurrence | Negative for recurrence |
| hsa-miR-188-5p  | 1.72                    | 3.31                    | -1.14                   | -1.13                   |
| hsa-miR-214-3p  | -38.56                  | -11.01                  | -53.56                  | -12.62                  |
| hsa-miR-505-5p  | -8.66                   | -4.01                   | -2.08                   | -2.42                   |
| hsa-miR-4455    | 1.93                    | 3.41                    | -1.06                   | 1.61                    |
| hsa-miR-6753-3p | 2.79                    | 6.41                    | 2.16                    | 2.26                    |
| hsa-miR-6877-3p | 4.49                    | 8.89                    | 1.66                    | 5.43                    |
| hsa-miR-101-5p  | 1.16                    | -3.52                   | 6.18                    | 2.11                    |
| hsa-miR-320c    | -2.45                   | -1.06                   | -11.11                  | -3.35                   |
| hsa-miR-320d    | -2.47                   | -1.1                    | -21.72                  | -4.94                   |
| hsa-miR-320e    | -1.41                   | 2.46                    | -21.88                  | -3.94                   |
| hsa-miR-378f    | -6.11                   | -4.2                    | -12.11                  | -6.17                   |
| hsa-miR-455-3p  | 1.64                    | -1.62                   | -2.25                   | -7.94                   |
| hsa-miR-4429    | -1.36                   | 1.66                    | -15.15                  | -3.65                   |

miRNA/miR, microRNA.
